# Supplementary material for: Preservation phenomena of methane hydrate in pore spaces
Source: Royal Society of Chemistry journal article supplement (doi:10.1039/c1cp22353d), 2011-01-01
Supplement: c1cp22353d.pdf [file c1cp22353d.pdf]

## Supporting Information

# Preservation phenomena of methane hydrate in pore spaces

Akihiro HACHIKUBO<sup>1</sup>, Satoshi TAKEYA\*<sup>2</sup>, Evgeny CHUVILIN<sup>3</sup>, Vladimir ISTOMIN<sup>4</sup>

<sup>1</sup> Kitami Institute of Technology, 165 Koen-cho, Kitami 090-8507, Japan

<sup>2</sup>National Institute of Advanced Industrial Science and Technology (AIST), Tsukuba 305-8565, Japan

<sup>3</sup>Moscow State University, Moscow 119991, Russia

<sup>4</sup>Gazprom VNIIGAZ LLC, Moscow Region, 142717, Russia

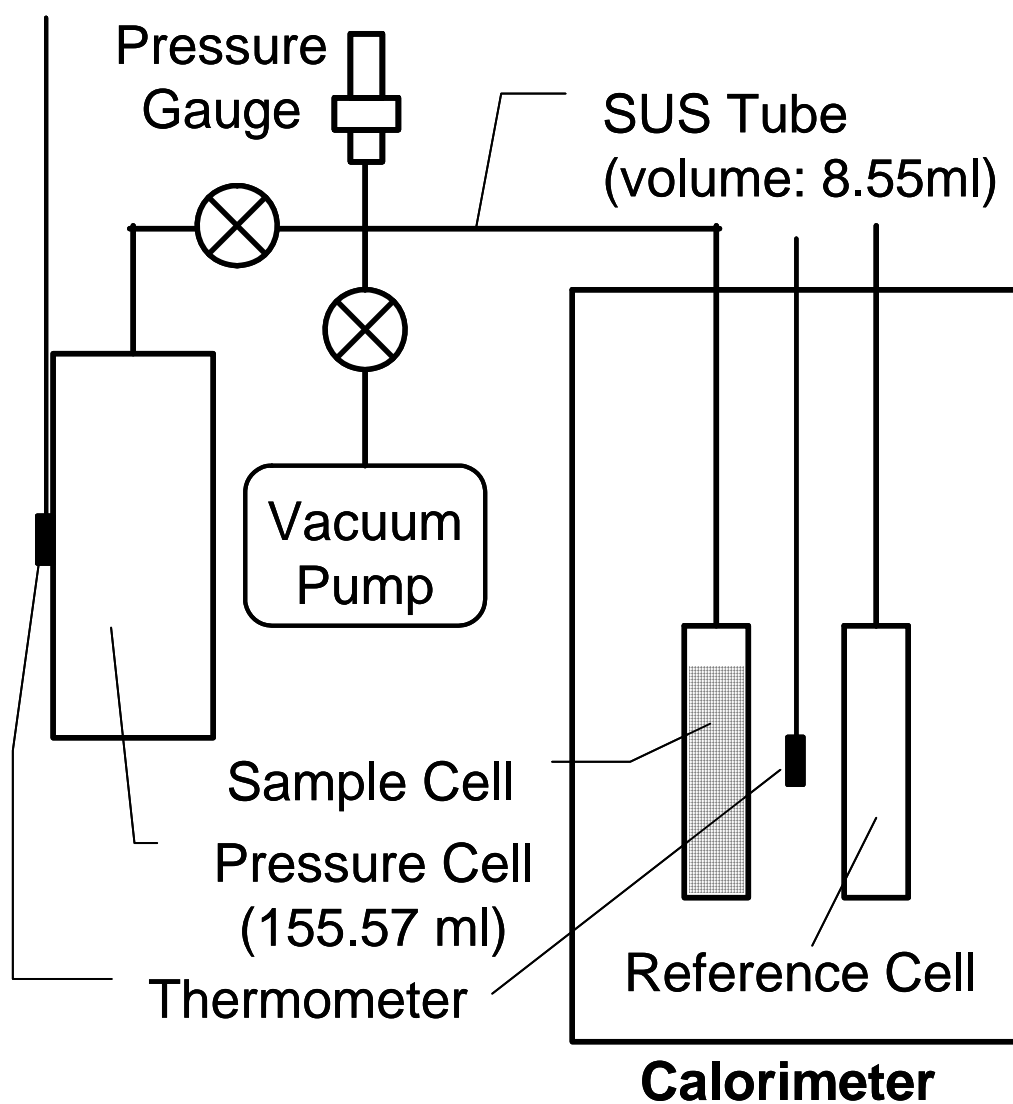

**Fig. S1.** Schematic view of the calorimetric system.<sup>1</sup>

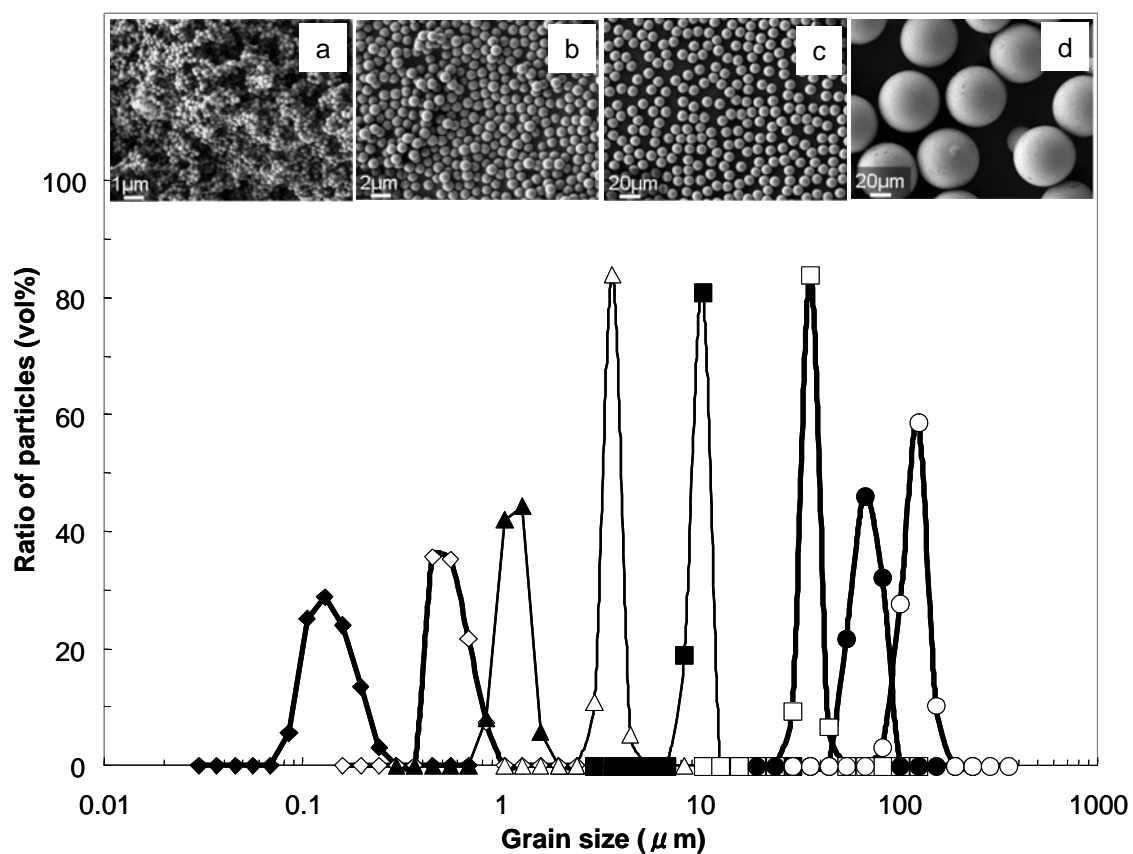

**Fig. S2.** Grain-size distribution of glass beads measured using a laser diffraction particle-size analyzer (SALD-2100, Shimadzu Corporation, Kyoto, Japan) and images of the beads using FE-SEM (JSM-7400F, JEOL Ltd., Tokyo, Japan). (a) N2N, (b) N3N 0.98  $\mu\text{m}$ , (c) N3N 8.66  $\mu\text{m}$ , (d) GBL-60.

**Table S1** Characteristics of glass beads and water contents of samples. The grain-size distributions were measured using a laser diffraction particle-size analyzer (SALD-2100, Shimadzu Corporation, Kyoto, Japan).

| Size of particles, $\mu\text{m}$ | Type of specimens (Company)                                         | Material                                                   | Water content (MH+glass beads), % | Water content (ice+glass beads), % |
|----------------------------------|---------------------------------------------------------------------|------------------------------------------------------------|-----------------------------------|------------------------------------|
| 100.36(7)                        | SPL-100 (UNITIKA)                                                   | CaO-Al <sub>2</sub> O <sub>3</sub> -SiO <sub>2</sub> GLASS | 18.1                              | 16.1                               |
| 56.33(7)                         | GBL-60 (The Association of Powder Process Industry and Engineering) | CaO-Al <sub>2</sub> O <sub>3</sub> -SiO <sub>2</sub> GLASS | 14.1                              | —                                  |
| 30.82(5)                         | GBL-30 (The Association of Powder Process Industry and Engineering) | CaO-Al <sub>2</sub> O <sub>3</sub> -SiO <sub>2</sub> GLASS | 16.1                              | 17.9                               |
| 8.66(5)                          | N3N (UBE-NITTO KASEI CO., LTD.)                                     | SiO <sub>2</sub> GLASS (99.9%)                             | 18.6                              | —                                  |
| 3.15(5)                          | N3N (UBE-NITTO KASEI CO., LTD.)                                     | SiO <sub>2</sub> GLASS (99.9%)                             | 21.0                              | —                                  |
| 0.98(7)                          | N3N (UBE-NITTO KASEI CO., LTD.)                                     | SiO <sub>2</sub> GLASS (99.9%)                             | 17.6                              | —                                  |
| 0.44(8)                          | COSMO 55 (JGC C&C)                                                  | SiO <sub>2</sub> GLASS (99.9%)                             | 18.4                              | 16.9                               |
| 0.11(10)                         | N2N (UBE-NITTO KASEI CO., LTD.)                                     | SiO <sub>2</sub> GLASS (99.9%)                             | 20.3                              | 15.5                               |

## Reference

- 1 A. Hachikubo, R. Nakagawa, D. Kubota, H. Sakagami, N. Takahashi and H. Shoji, Proceedings of the 6th International Conference on Gas Hydrates, Vancouver, 2008.
